# Supplementary material for: Differentiating the roles of Mycobacterium tuberculosis substrate binding proteins, FecB and FecB2, in iron uptake
Source: PubMed Central journal article supplement (PMC10553834; doi:10.1371/journal.ppat.1011650), 2023-09-25
Supplement: ppat.1011650.s001.pdf [file ppat.1011650.s001.pdf]

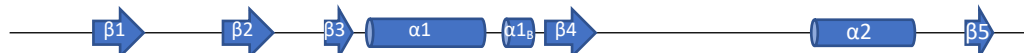

*Mt-FecB* -----AAAADPGPPTFAHNAAGVSPMEQVPAEAQRIVVL-S-GDQLDALCALGLQSRIVAALPN-----SS-SS-QPS-----Y-LGTT-VH-----D-LPVGTR-S 142  
*Mt-FecB2* -----AAVTITHL-----FGQTVIKPEPPKRVVSA-G-YTEQDLDLAVDVV-PIAVTDWF-GD-QPFAVW--P-WAAPK-L-GGAR-PAVLNL-DN 86  
*Mt-FecB2* -----DDGSVTVRHA-----FGDITIPGPPQRVVSA-G-LTEQDLDLAVGVV-PIAVTDWF-GG-EPFVW--P-WAQRQ-L-AGAQ-PAVLNL-DN 107  
*Ec-PitE* -----EPVQVFTDDL-----GRKVTVPAPHKRVVSL-H-DLDTITPLIELGVP-PVASHGRT-----RPDGSFH-IRS-GAL-LTGV-DF-----DNSSIAFIGT-A 97  
*Sp-PiaA* -----EHAPDKIVLDHA-----FGQTLDDKPERVATI-A-GNHDDVALALGIV-PVGFSAKRVVSA-DK-GVL--P-WTEEK-IKELNGK--ANLFDDL-D 114  
*Sa-SirA* -----TTSIKHAM-----GTTEIKGPKKRVVTL-Y-QGATDVAVALGVK--PVGAVESW--TQ--KP-KFE--Y-IKND-LK-----D-TKIVGQE-P 104  
*Sa-HtsA* -----ASTISVKDEN-----YTFVVKDAKRVVTL-E-YSFADLALADVK--PVGADD--GK-KK--IKPVREK-IG--D-YTSVGT-K 105  
*Bc-YfiY* -----EVVVEHEM-----GKTEVPNAKRVVTL-T-NEGTEALLELGVK--PVGAVESW--TG--DWD-WYP--H-I-KDK-MK-----D-VKVVGD-G 104  
*Ba-FpuA* -----ITIKHAE-----GETPKLDAKRVVTL-E-WVYSEDLLALGVQ--PVGAD--IK-NYNKVVH--TKTK-PS--K-DVVVDGTR-Q 140  
*Bs-PhuD* -----KKKIEYLD-----KTYEVVTPDRIAITGS--VESMEDAKILLDVH--POGAISE--S-GK-FPD--M--FKDI-TD--K-AEPTGE-K-M 85  
*Sp-PhuD* -----TKAFNLKTAGKEKIDIPKPKRVVVM-A-PTYAGGLKYLDA--NIVGVSDQ--VD-QSP--V-LAQK-FK--D-VDKVGA-- 71  
*Sa-PhuD2* -----ETKSYKMD--GKTVDIPKPKRIAVV-A-PTYAGGLKLG-A-NIVAVNQV--VD-QSK--V-LKDK-FK--G-VTKIG-- 92  
*Bs-YclQ* -----KEQITVKKHQ--LDKNKTKVPKNPKRVVVF-D-FGSLDLDLKLGLDDIVAGLPKQ--V-LPK--Y--LS-K-FK--D-DKYADVGS-L-K 84  
*Sa-FeuA* -----YKAE--NGNVKIPKPKRVVVM-A-DGYGYFKTGLI--NVVGAPEN--VFNK--PY--YKGTNGV--V-ENIGDG-- 105  
*Sa-IsdE* -----GVRIVPT-T-VATLMTLKLKLLP--IVGKPT--SYKT--LPNR-YK--D-VPIIGQP-M 78  
*Cg-HmuT* DPFRTFTGLSIVEDIGDVPVTDNASPA--LPVSLTDAD--GNDVVVE-DVSRILPL-DLYGTYSKTIAGLGLVDNIVGRTVS--ST--E-P-A-LA--D-TEVVTTGGH 141  
*Sd-ShuT* -----AAERIVVA-G-GSLTELIYAMGAGERVVGVDET-----TS--Y--PP-E-TA--K--LPHIGQW-K 69

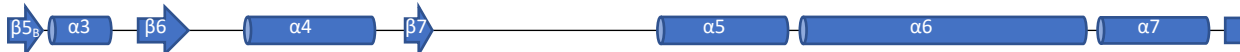

*Mt-FecB* APDLRAIAAHPDLILGS--QGLT-P-Q-LYPQLA-AIAPTIVFT--A--AP--GA--DW-ENNRGVGAATARIAAVDALIT--GFAEHATQVGT--KHD--A--TH-FQASI 231  
*Mt-FecB2* GIQIDRIAALKPDLIVAI--NAGV-DAD-TYQQLS-AIAPTVAQSGGDA--FF--E--PW-KDQARSIGQAVFAADRMRSLIE--AVDQKFAVAQ--RHP-RW--RG-KKALL 180  
*Mt-FecB2* GIPVEEIAALKPDLIVAT--NAGL-DAD-TYARLS-EIAPTVAQSGSA--FF--E--PW-KDQATIIGQAVFKNAMETELIK--SVDDRFTVKT--DHP-QF--SG-KKALL 201  
*Ec-PitE* DIDIEAIVAAKPDLIITE--P-TR-N-T-PIERLE-KIAPTIVI--D--H--LKGGA-PEIYRKLAEELGTQSQSLAILER--RYQAQINAKLA--TLD-S--QK--ITVSV 185  
*Sp-PiaA* GLNFEAISNSKPDVILAG--YSGI-TKE-DYDFTLS-KIAPVAAY--KSKPQ--TL--W-RDMIKIDSKALGMEKEGDELIK--NTEARISKELEKHPKIGK--I--KG-KKVL 211  
*Sa-SirA* APNLEEISKLKPDLIIVS--KRN-E-K-VYDQLS-KIAPTIVST--D--V--D--KF-KDITKLMGKALGKEKEADELLK--KYDDKVAAFQK--DAKAKYDAMP--LKASV 197  
*Sa-HtsA* QPNLEEISKLKPDLIAD--SS--H-K-G-INKELN-KIAPTLSSL--K--SPD--GD--YKQN--NSFKTIKALNKEKEGEEKR--EHDKLINKYKD--ELK--F--DRN--QKVL 198  
*Bc-YfiY* QVNVEIASLKPDLIIGN--KMH-E-K-VYEQLE-AIAPTIVS--E--TL--G--EW-KDNFKFYAKALNKEKEGQKVVA--DYESRMDLKG--KLG-DK--VN--QKISM 160  
*Ba-FpuA* QPNLEEISKLKPDLIITA--SFRG-K-A-KNLEK-KIAPTIVM--D--PSTSNNDHF--AEMETFKQIAKAVGKEEGEKVLA--DMFKAFADAKA--KIE--KADLK--KNIAM 201  
*Bs-PhuD* ENPIEKILEMPPDILAS--TFP-P-EKTLQKIS-TAGTITIV--SH--IS--SNW-KENMLLAQLQKKEKAKKIIA--DYEQDLKETKT--KKNDKA--KD--SKALV 176  
*Sp-PhuD* E-DVEKVASLKPDLIITY--NTD-K--NNTDLK-KIAPTIAF--D--Y--AKYN-LEQOEAMGDVIGKSDVEKWKKA--DWEKQTAQDSK--DKK-AHLGD--TSVTI 160  
*Sa-PhuD2* DGDVEKVAKEKPDLIIVY--S-T-D-K-DIKKYQ-KVAPTIVV--D--YN--KH--KY-LEQOEHLGKIVGKEDKVKAWK--DWEETAKDGG--EIK--KAIGQD--ATVSL 182  
*Bs-YclQ* EPDFDKVAELPDLIIS--ARQ-S-E-SYKEFS-KIAPTIYL--GV--DTAKYMESF-KSDAETIGKIPDKEDKVKDELA--NIDHSIADVKK--T--A--EKLNKNGLV 176  
*Bs-FeuA* -TSVEKVIDLNPDLIIVW--TTQG--A-DIKKLE-KIAPTIVAV--K--YD--KL--DN-LEQLKEFAMTGTEDKAEEKWLA--KWDKVVAAAKT--KIKKAV--GD--KTISI 194  
*Sa-IsdE* EPNVEAVKLLKPTHVLSVSTIKDEM-Q-P-FYKQLN-M--KGYF--Y--DF--DS--LKM-GKSTIQDQFNRRKAQAKELND--HLNSVKQKIEH--KAA--QKKH--PKVLI 171  
*Cg-HmuT* TLNAEAILNLHPTLVIIID--HSGIQR-E-VIDQIRAAAGVATVIM--S--PQ--RS--IASI-GDDIRDIASVVLPEGEKLAERSVAEVEASTVVD--ELT--PEDP--LKMVF 238  
*Sd-ShuT* QLSSEGILSLRPDSVITW--QDAG-P-QIVLDQLRAQKVNVTLL--P--R--V--PA--TLEQM-YANIRQLAKTLQVPEGGDALVT--QINQRLERVQQ--NVA--AKKAP--VKAMF 165

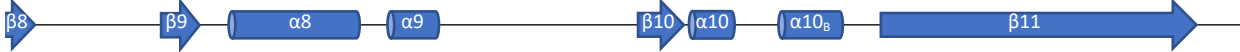

*Mt-FecB* VQLTA--N---TMRVYG-ANNF-PASVL-S-AVGDRPPQRS--F-----TDK--A-YIEIGTAAADLAKSPDF-S-AAD-ADIVY-----LSCA--S 300  
*Mt-FecB2* LQGRLL--W--QGNVATL-AGWR--TDFL-N-DMGLVIADSIK--P-----FAVD--Q-RGVIP--RDHKA-VLDAADVLI-----WMTF--E 244  
*Mt-FecB2* LGGLT--Y--RGGVQATP-PGWR--TDFL-T-QMGLTVLQV-----PALIP--RDEIAS-VLDGADVLI-----WTTF--E 257  
*Ec-PitE* IQANQ--G--KINVMH-SYHS-LGRVL-R-DAGFRPPLIE-SI-----PEG-G-RMDVSA--ERL-P-ELD-ADVF--VVKV--G 249  
*Sp-PiaA* TMINAADTS--KFWIYV-SKDP-RANYL-T-DLGLVPEESL-KEF--ESEDSEF-AKETSAB--EANKINDAD-VIITGDDKTLEALQKDPLLGKINAIKNGAVAVIPD-N 308  
*Sa-SirA* VNFRA--D--HTRIYA-GGY-AGEEL-N-DLGFKRNKDLQ-KQV--DNG-KD-I-OLTS--KESI-P-LMN-ADHIF--VVKV--D 261  
*Sa-HtsA* AVVRA--A--GLLAIR-P-NYSY-VGQFL-N-ELGFKN--ALS--DDVTKGLSKVLKG--P-YLQLD--T-HL-ADLNP-E-RMI--IMTD-H 266  
*Bc-YfiY* VRFMP--G--DVRUYH-GDVT-SGVIL-K-ELGFKRPGDN--K--D--D--F-AERNVS--KERI-S-AMD-GDVLFF--YFTF--D 198  
*Ba-FpuA* AQAFI--A--AKNVPFRLT-DNSL-ALQVT-K-KLGLTNT-FEA--G--KSEPDG-FKQIT--VESL-Q-SVQ-DSNFI--YIVA--D 267  
*Bs-PhuD* IRIRO--G--NIYIY-P-EQVY-FNSYLYG-DLGLKAPNEVK--A--A--K-A--F-DELIS--LEKL-S-EMN-PDHF--VQFS--D 237  
*Sp-PhuD* FEDFD--K--KIVAYG-KNWGRGSEVLVQ-AFLGLQMPKALD-DAT--KKE-G-WTEVPK--EEV-G-KYA-GDVII--TAKA--K 225  
*Sa-PhuD2* FDFPD--K--KLYTYGDNWR-GGEVL-YQAFGLKMQPQE-KLT--KAS-G-WAEVQK--EEI-E-KVA-CDYIV--STSE--G 247  
*Bs-YclQ* IMAND--K--KISAFG-PKSR-YGLIH-D-VFGVAPA-DQN--I-----KAS--THGQSVS--YEYI-S-KTN-PDYLF--VIDRGTATG 241  
*Bs-FeuA* MQTNG--K--DIVVFG-KDFGRGGSIIYK-DLGLQATKLTKERAI--DQG-PG-YTSSIS--EKL-P-DFA-GDYIF--AGPW--Q 261  
*Sa-IsdE* LMGVPI--G--SYLVAT-DKSY-LGDVL-K-IAGENV-IR--V-----KDR-Q-YTSSN--TENL-L-NIN-PDIIIL--RHLH--GMP 232  
*Cg-HmuT* LVARQ-TGG--VFPILG-DAYG-GRDLI-E--GLGGVD-MAA--E-----KGIM-D-LAPA--NAEA-LAEIN-PDVVF--MMSG--L 301  
*Sd-ShuT* ILSAGG--S--APQVAG-KGSV--DAIL-S-LAGAEN-VAT--H-----Q-Q-Q-VKSY--SAESI-I-AAN-PEVIV-----VTSQ--D 222

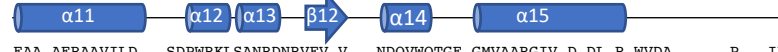

*Mt-FecB* -----EAA-AERAAVILD-----SDPWRKLSANRDNRVFV-V--NDQVWQTGE-GMVAARGIV-D-DL-R-WVDA-----P--IN 359  
*Mt-FecB2* -----S-PEDKALLA--DPEIAASQATAQRHRIF-TSKELAGAIA-FS-SVLSPVVA-EQLP-P-QISQILG 304  
*Mt-FecB2* -----S-QDQRDALLA--DPVIAQAATRDRNRIF-TTKELAGAIA-FA-SPLSPVVA-DQLP-P-ELARVLG 317  
*Ec-PitE* -----DTGGV-PQDELATMEKVMPCWQFLTACRSGRYVL-I-----SREEAI-SN-SFASLGLMA-AQI-QSQIAGRPL--P 312  
*Sp-PiaA* -----TPLASACT--P-TPLSINYTI-EEYL-N-LLGNACKNAK 341  
*Sa-SirA* PNAKDAALV-KKTESWTS--SKWKNLDAVKNQVSDLL--DEITWNLAG-GYKSSKLKI-D-DL-YEKLNIKQ 328  
*Sa-HtsA* -----AKKDSAEFKLQE--DATWKKLNVAKNRNRDI-V--DDVWAQ--GLISSEEMA-K-EL-VELSCK 324  
*Bc-YfiY* -----KGNKQK-SLESEKYEIN--DPLPKNLNAVKNKAYK-V--DDVIWNTAG-GVIAANLLL-D-DIEK-RFV 281  
*Ba-FpuA* -----E--DNIFDQLK--GNPAWELKFKKKNMYK-L--KQDTWIF-G-GPESATSLA-T-K-AA-AEKLQ-KNLA 322  
*Bs-PhuD* -----DENADK-PDAKLEK--NPINKSLKAVKEDHVYV-N-SVDPLA--QGG-TAWSKVRFL-K-AA-AEKLQ-KNLA 301  
*Sp-PhuD* -----D--AAQP-EFQK--TAMQNLKAVQNKYAFN-V--DSSVYV-YN-DPYTLDFMR-K-DL-KKLLA-LPT 281  
*Sa-PhuD2* -----K-P-TPG--YEST--NM-WKNLKATKEGHIVK-V--DAGT-YWYN-DPYTLDFMR-K-DL-KEKLKAAK 302  
*Bs-YclQ* -----ETS--STQGVVE--NDYKKNVAVKNHGVIIY-L--DSATWYLSGGGLESMTQMI-K-EV-KDGLKEN 299  
*Bs-FeuA* -----SG--GDDGQVF--SISWKNLNAVKNHGVIIY-M--DPVIGPYFT-DPISLEBQLE-F-IT--ESLTKL 316  
*Sa-IsdE* -----EVV-KKMFQKFE--QNDIKWFKKAVKNHVVYD-L--EEVPPGITA-NVD-ADKAM-T-QL-YDLFYK 289  
*Cg-HmuT* -----V-S-TGCDLGLME--RPGIAQFTAGQNRVLA-L--PQQSL-AF-GAQ-TGELLR-AS-R-ELYV-Q 356  
*Sd-ShuT* -----MV-DGD-INRLR--SIAGITHTAAWKNQRIITV--DQNLIL-GM-GPR-IADV-E-SLHQQLWP 277
