# Supplementary material for: Differentiating the roles of Mycobacterium tuberculosis substrate binding proteins, FecB and FecB2, in iron uptake
Source: PubMed Central journal article supplement (PMC10553834; doi:10.1371/journal.ppat.1011650), 2023-09-25

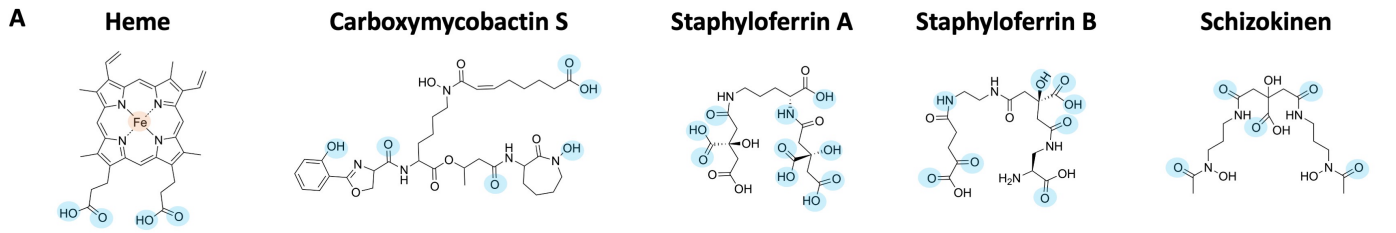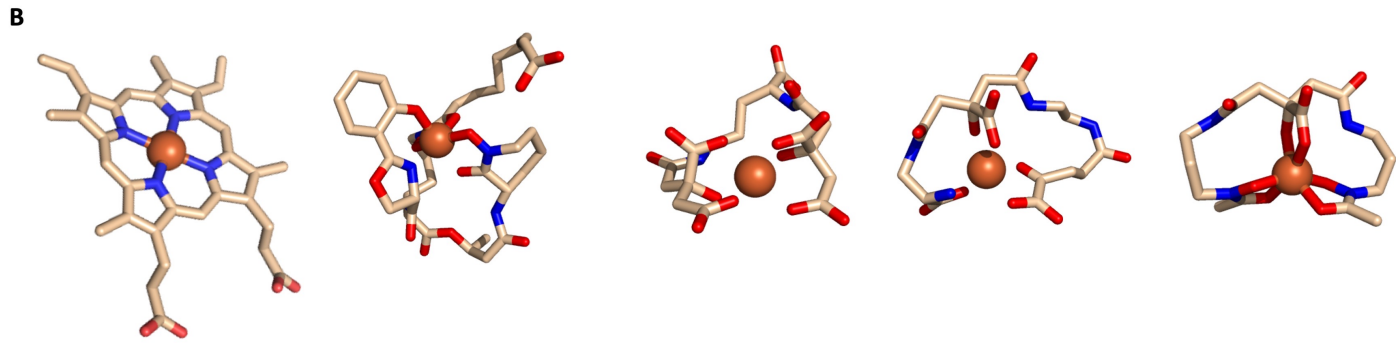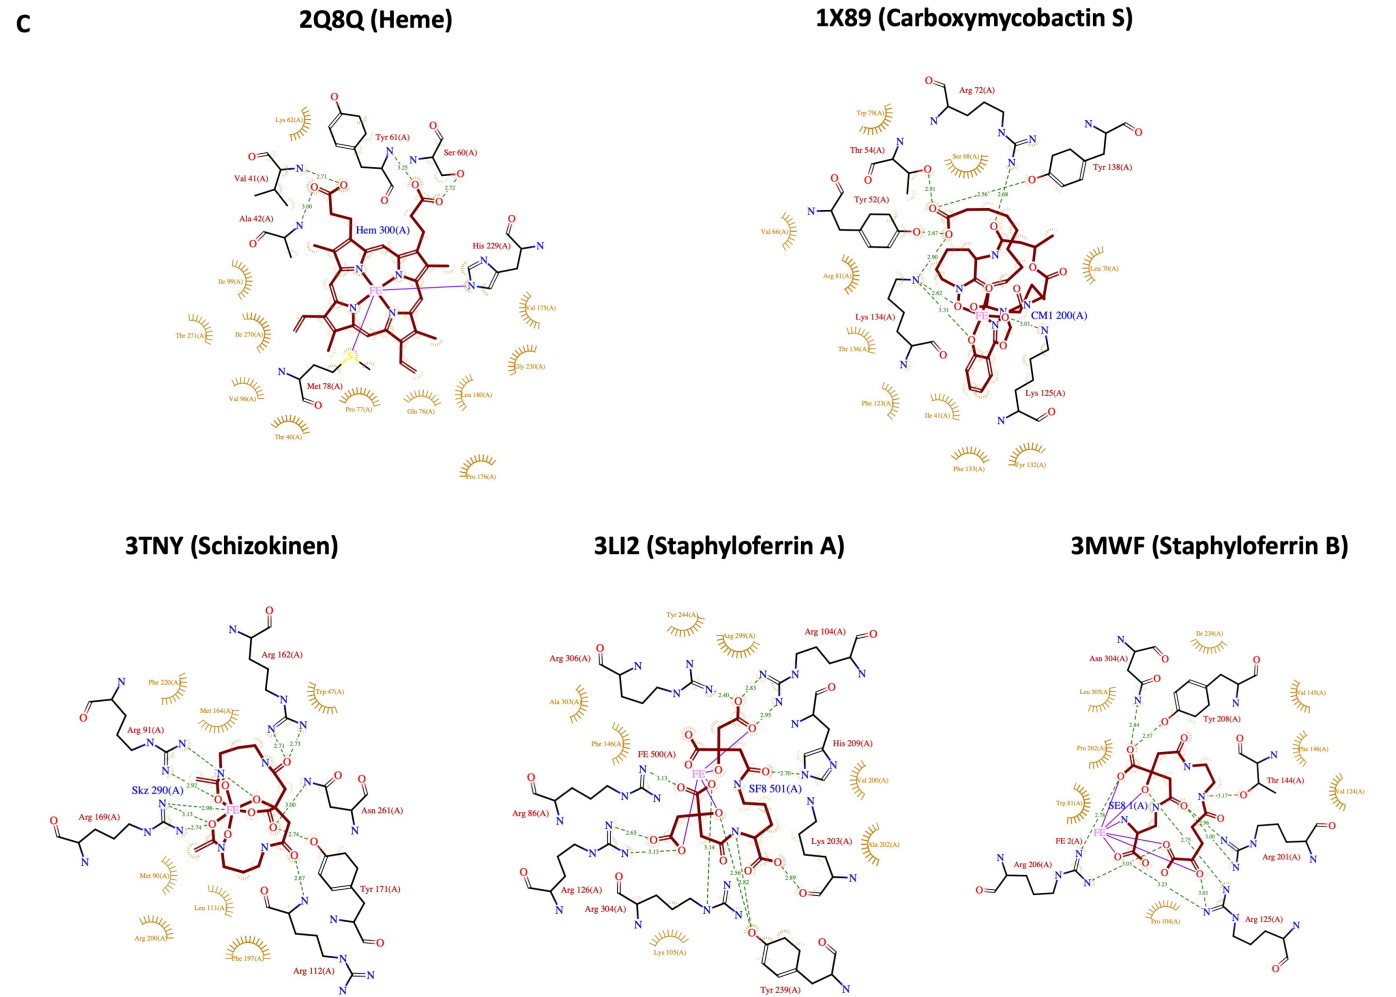

Supplement: ppat.1011650.s004.pdf [file ppat.1011650.s004.pdf]
