# Supplementary material for: Differentiating the roles of Mycobacterium tuberculosis substrate binding proteins, FecB and FecB2, in iron uptake
Source: PubMed Central journal article supplement (PMC10553834; doi:10.1371/journal.ppat.1011650), 2023-09-25

# A +HisTag FecB

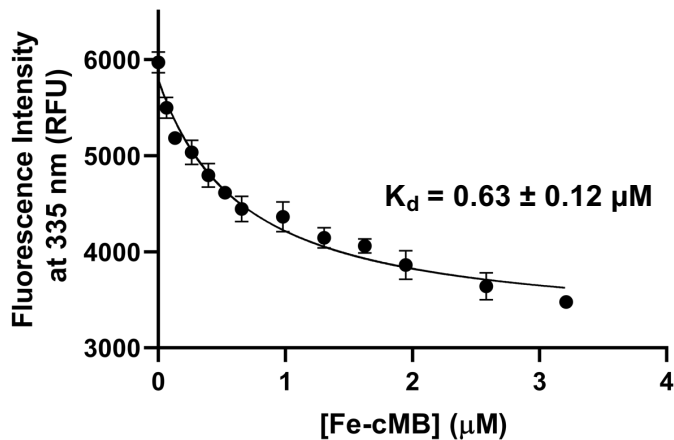

# FecB2

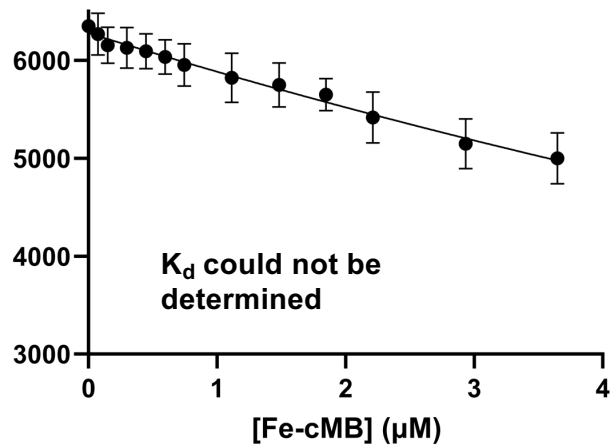

# B No-HisTag

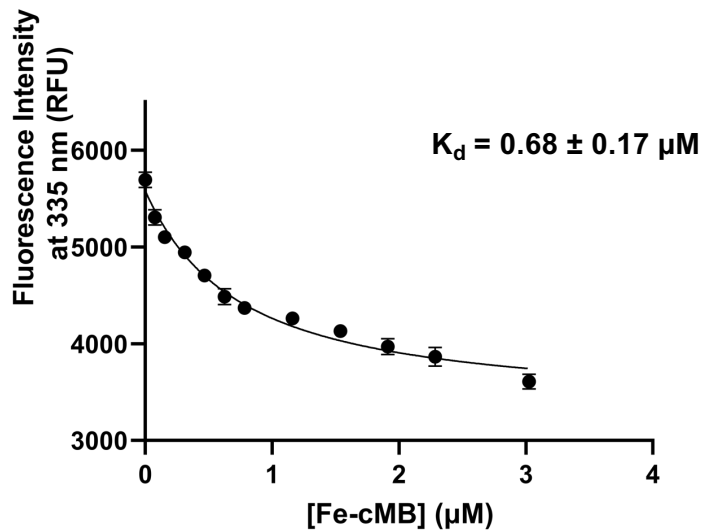

Supplement: ppat.1011650.s006.pdf [file ppat.1011650.s006.pdf]
