# Supplementary material for: Differentiating the roles of Mycobacterium tuberculosis substrate binding proteins, FecB and FecB2, in iron uptake
Source: PubMed Central journal article supplement (PMC10553834; doi:10.1371/journal.ppat.1011650), 2023-09-25

## A. Apo-cMB

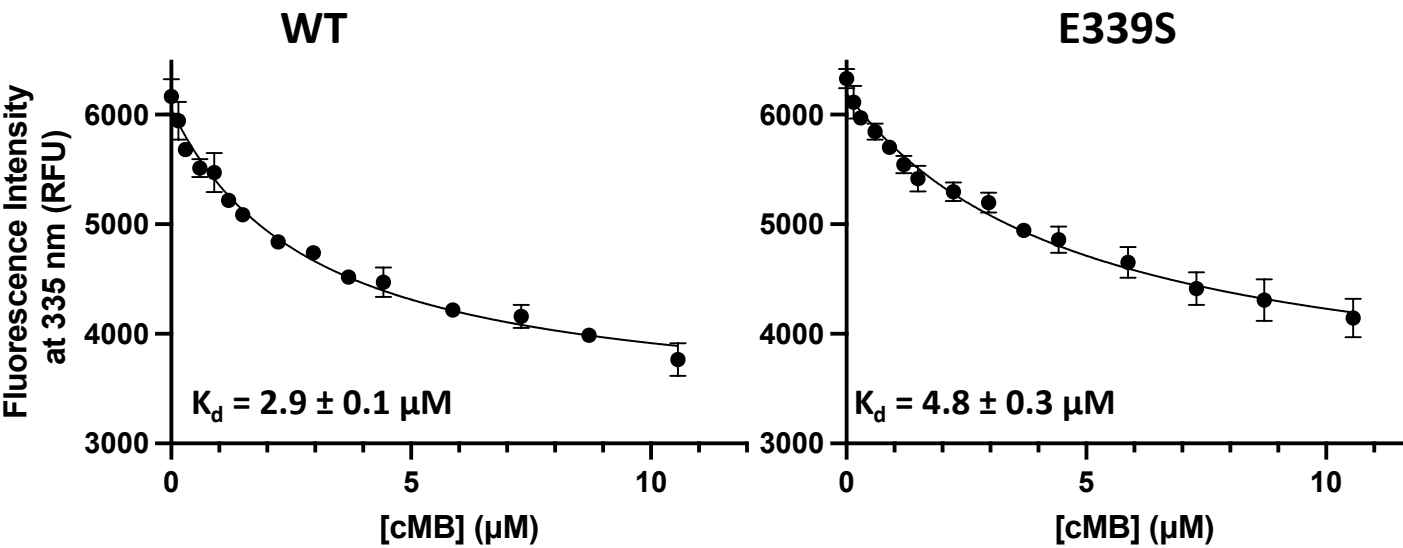

## B.

### Fe-mycobactin J (Fe-MBJ)

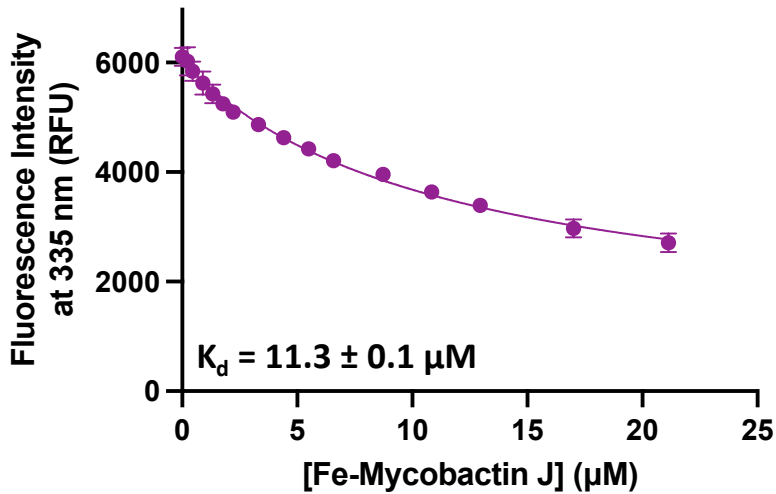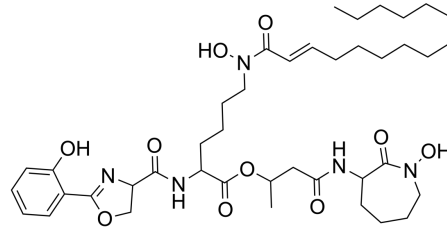

c.

### Fe-Pyoverdines

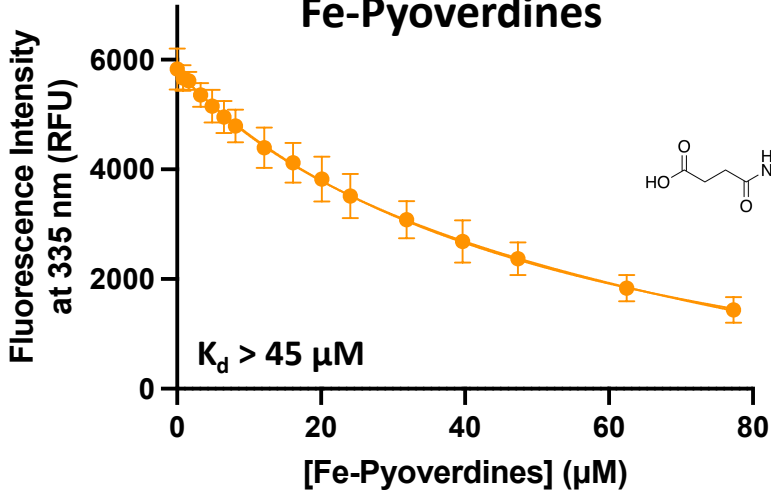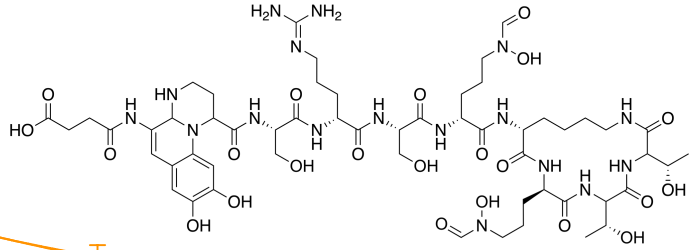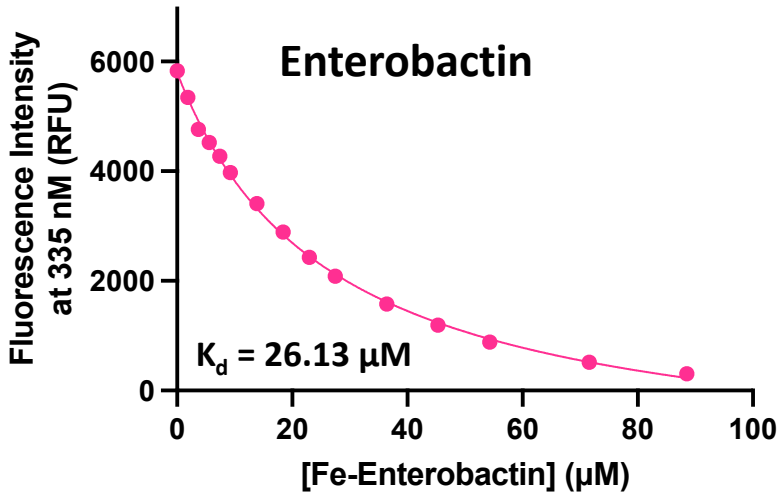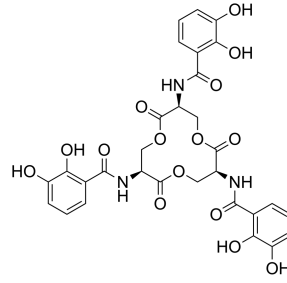

Supplement: ppat.1011650.s009.pdf [file ppat.1011650.s009.pdf]
