# Supplementary material for: Differentiating the roles of Mycobacterium tuberculosis substrate binding proteins, FecB and FecB2, in iron uptake
Source: PubMed Central journal article supplement (PMC10553834; doi:10.1371/journal.ppat.1011650), 2023-09-25

# FecB2

## WT

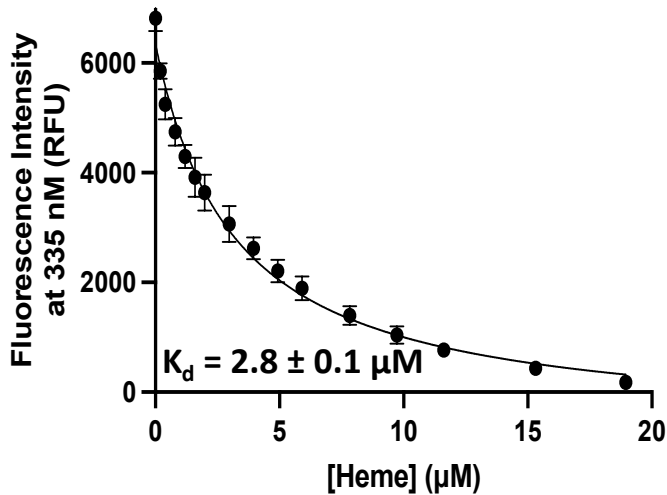

## Y39S

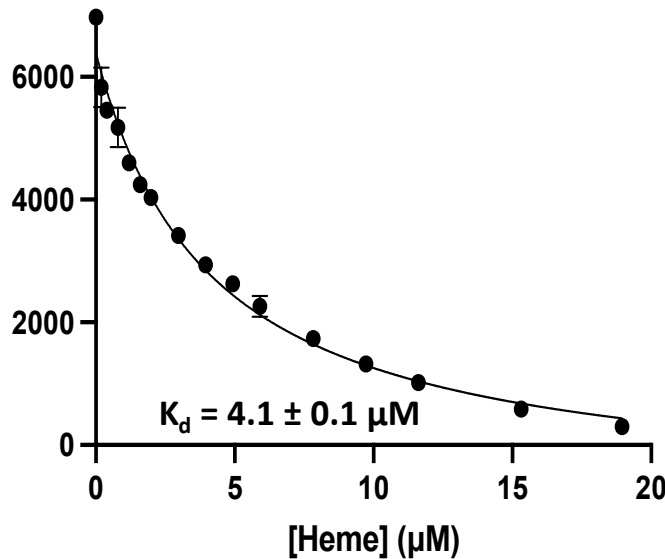

## R184S

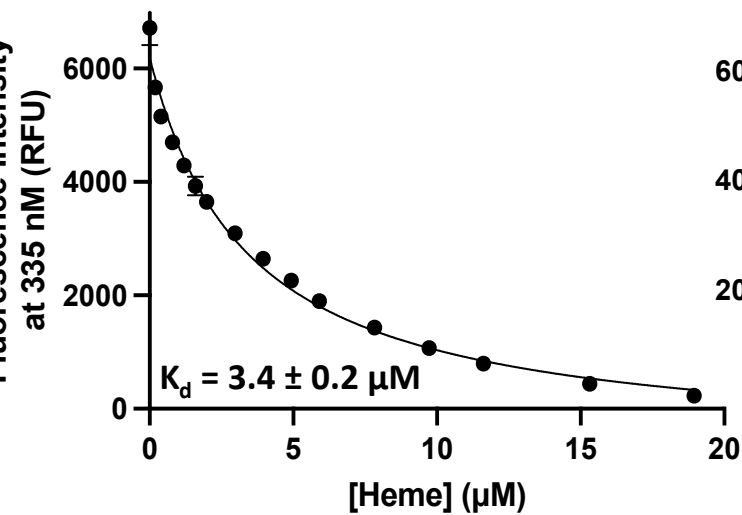

## W58S

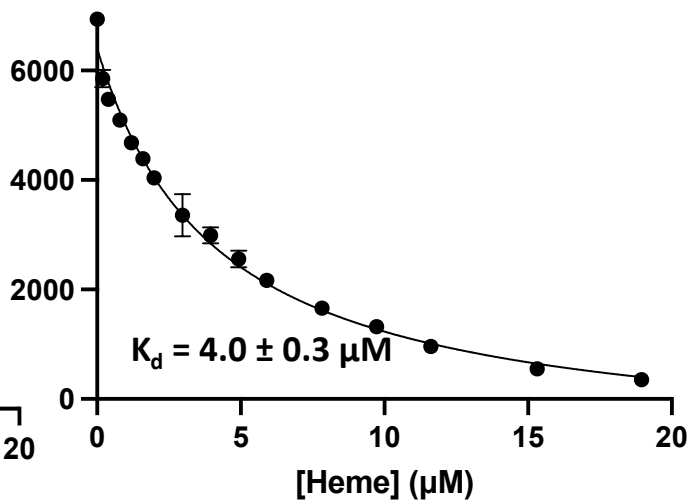

Supplement: ppat.1011650.s011.pdf [file ppat.1011650.s011.pdf]
