# Supplementary material for: Differentiating the roles of Mycobacterium tuberculosis substrate binding proteins, FecB and FecB2, in iron uptake
Source: PubMed Central journal article supplement (PMC10553834; doi:10.1371/journal.ppat.1011650), 2023-09-25
Supplement: ppat.1011650.s012.pdf [file ppat.1011650.s012.pdf]

## Supplemental Figure 12A

All peptides from FLAG pulldown and sequencing are below. Those that are highlighted in yellow are included in the sequence of Msm-FecB (MSMEG\_1039) and the coverage of these peptides is depicted in pink. The first 42 residues are not observed suggesting that the signal peptide has been processed.

AADPDLILGSAALTPGAFGELSDIAPTFTGTPGAAWR;  
AAPDVAAIR;  
ADAVLKGDRAW;  
ADAVLKGDARW;  
AGAADDLIAGFEDAAR;  
AGAADDLIAGFEDAARK;  
AVGAATGR;DKADAVLK;  
DKADAVLKGDRAW;  
DTLRAVGAATGR;  
FTDKPYEEIPADSDDFSIADADIVYVSFASPAAR;  
IADAGVLGNQR  
IVAAALPDGSDAQPSYLGTVVHDVPPAGDR;  
VVLSGDQLDALCALGLQSR;  
KLSANRDNR;  
KTGEDNDAAHFQASVVQLTENTVR;  
LSANRDNR;  
NATADGADIAETTEVAGDPQR;  
PDESCAPEPVAADPAPR;  
RPDESCAPEPVAADPAPR;  
RPDESCAPEPVAADPAPRR;  
TGEDNDAAHFQASVVQLTENTVR;  
VFGADNFPGDVLAAVGLDR;  
VFGADNFPGDVLAAVGLDRPAAQR;  
VFVNNNEVWQTGQNIVAAR;  
VRNATADGADIAETTEVAGDPQR;  
WVNAPIN

MSEMG\_1039 (FecB)

We don't see the first 42 residues

MLTFRPLVGTALIAAAASLISGCGTSGEQPVTQPSMTTSVTKIADAGVLGNQR  
PEPVAADPAPRRVRNATADGADIAETTEVAGDPQRIVVL  
SGDQLDALCALGLQSRIVAAALPDGSDAQPSYLGTVVHDVPPAGDRAAPDVAAIRAADPDLILGSAALTPGAFGELSDIAPTFTGTPGAAWRDTLRAVGAATGRAGAADDLIAGFEDAARKTGEDNDAAHFQASVVQLTENTVRVFGADNFPGDVLAAVGLDRPAAQRFTDKPYEEIPADSDDFSIADADIVYVSFASPAARDKADAVLKGDARWKL SANRDNRVFVNNNEVWQTGQNIVAARGILDDLWVNAPIN

# Supplemental Figure 12B

FecB2 (MSMEG\_0438) peptides coverage. 95% including the apparent signal peptide.

RGFLAVTAGLALVAACSTDKPGEVADDGSVTVR;  
GFLAVTAGLALVAACSTDKPGEVADDGSVTVR;  
PGEVADDGSVTVR;  
HAFGDTTIPGPPQR;  
VVSAGLTEQDDLLAVGVPIAVTDWFGGEPFGVWPWAQR  
QLAGAQPAVLNLDNGIPVEEIAALKPDLIVATNAGLDADTYAK;  
LSEIAPTVAQTGSEAFFEPWK;  
LSEIAPTVAQTGSEAFFEPWKDQATIIGQAVFK;  
DQATIIGQAVFK;  
NAEMTELIK;  
NAEMTELIKSVDDR;  
NAEMTELIKSVDDRFTTVK;  
SVDDRFTTVK;  
TDHPQFSGKK  
TDHPQFSGKKALLLGGTLYR;  
SVDDRFTTVKTDHPQFSGK;  
FTTVKTDHPQFSGK;  
FTTVKTDHPQFSGKK  
TDFLTQMGLTVLQVPALIPR;  
TDHPQFSGK;  
KALLLGGTLYR;  
ALLLGGTLYR;  
ALLLGGTLYRGGVQATPPGWR;  
GGVQATPPGWR;  
DEIASVLDGADVLIWTTESDQDR;  
DEIASVLDGADVLIWTTESDQDRDALLADPIVAQLAATR;  
DEIASVLDGADVLIWTTESDQDRDALLADPIVAQLAATRR;  
DALLADPIVAQLAATR;  
DALLADPIVAQLAATRR;  
DRNIFTTK;  
ELAGAIASFASPLSYPVVADQLPPELAR;

MSMEG\_0438

MPRPLTRRGFLAVTAGLALVAACSTDKPGEVADDGSVTVRHAFGDTTIPGPPQRVVSAGLTEQDDLLA  
VGVVPIAVTDWFGGEPFGVWPWAQRQLAGAQPAVLNLDNGIPVEEIAALKPDLIVATNAGLDADTYAK  
LSEIAPTVAQTGSEAFFEPWKDQATIIGQAVFKNAEMTELIKSVDDRFTTVKTDHPQFSGKKALLLGG  
TLYRGGVQATPPGWRDFTLTQMGLTVLQVPALIPRDEIASVLDGADVLIWTTESDQDRDALLADPIVA  
QLAATRRDRNIFTTKELAGAIASFASPLSYPVVADQLPPELARVLG
